# Supplementary material for: MnO nanocrystals incorporated in a N-containing carbon matrix for Li ion battery anodes
Source: Royal Society of Chemistry journal article supplement (doi:10.1039/c6ra00571c), 2016-01-01
Supplement: c6ra00571c1.pdf [file c6ra00571c1.pdf]

# **Electronic Supplementary Information for MnO nanocrystals incorporated in N-containing carbon matrix for Li ion battery anodes**

By Chunyu Zhu\*, Cheng-gong Han, Genki Saito, Tomohiro Akiyama

Center for Advanced Research of Energy & Materials, Hokkaido  
University, Sapporo 060-8628, Japan.

E-mail: [chunyu6zhu@gmail.com](mailto:chunyu6zhu@gmail.com) or [chunyu6zhu@eng.hokudai.ac.jp](mailto:chunyu6zhu@eng.hokudai.ac.jp)

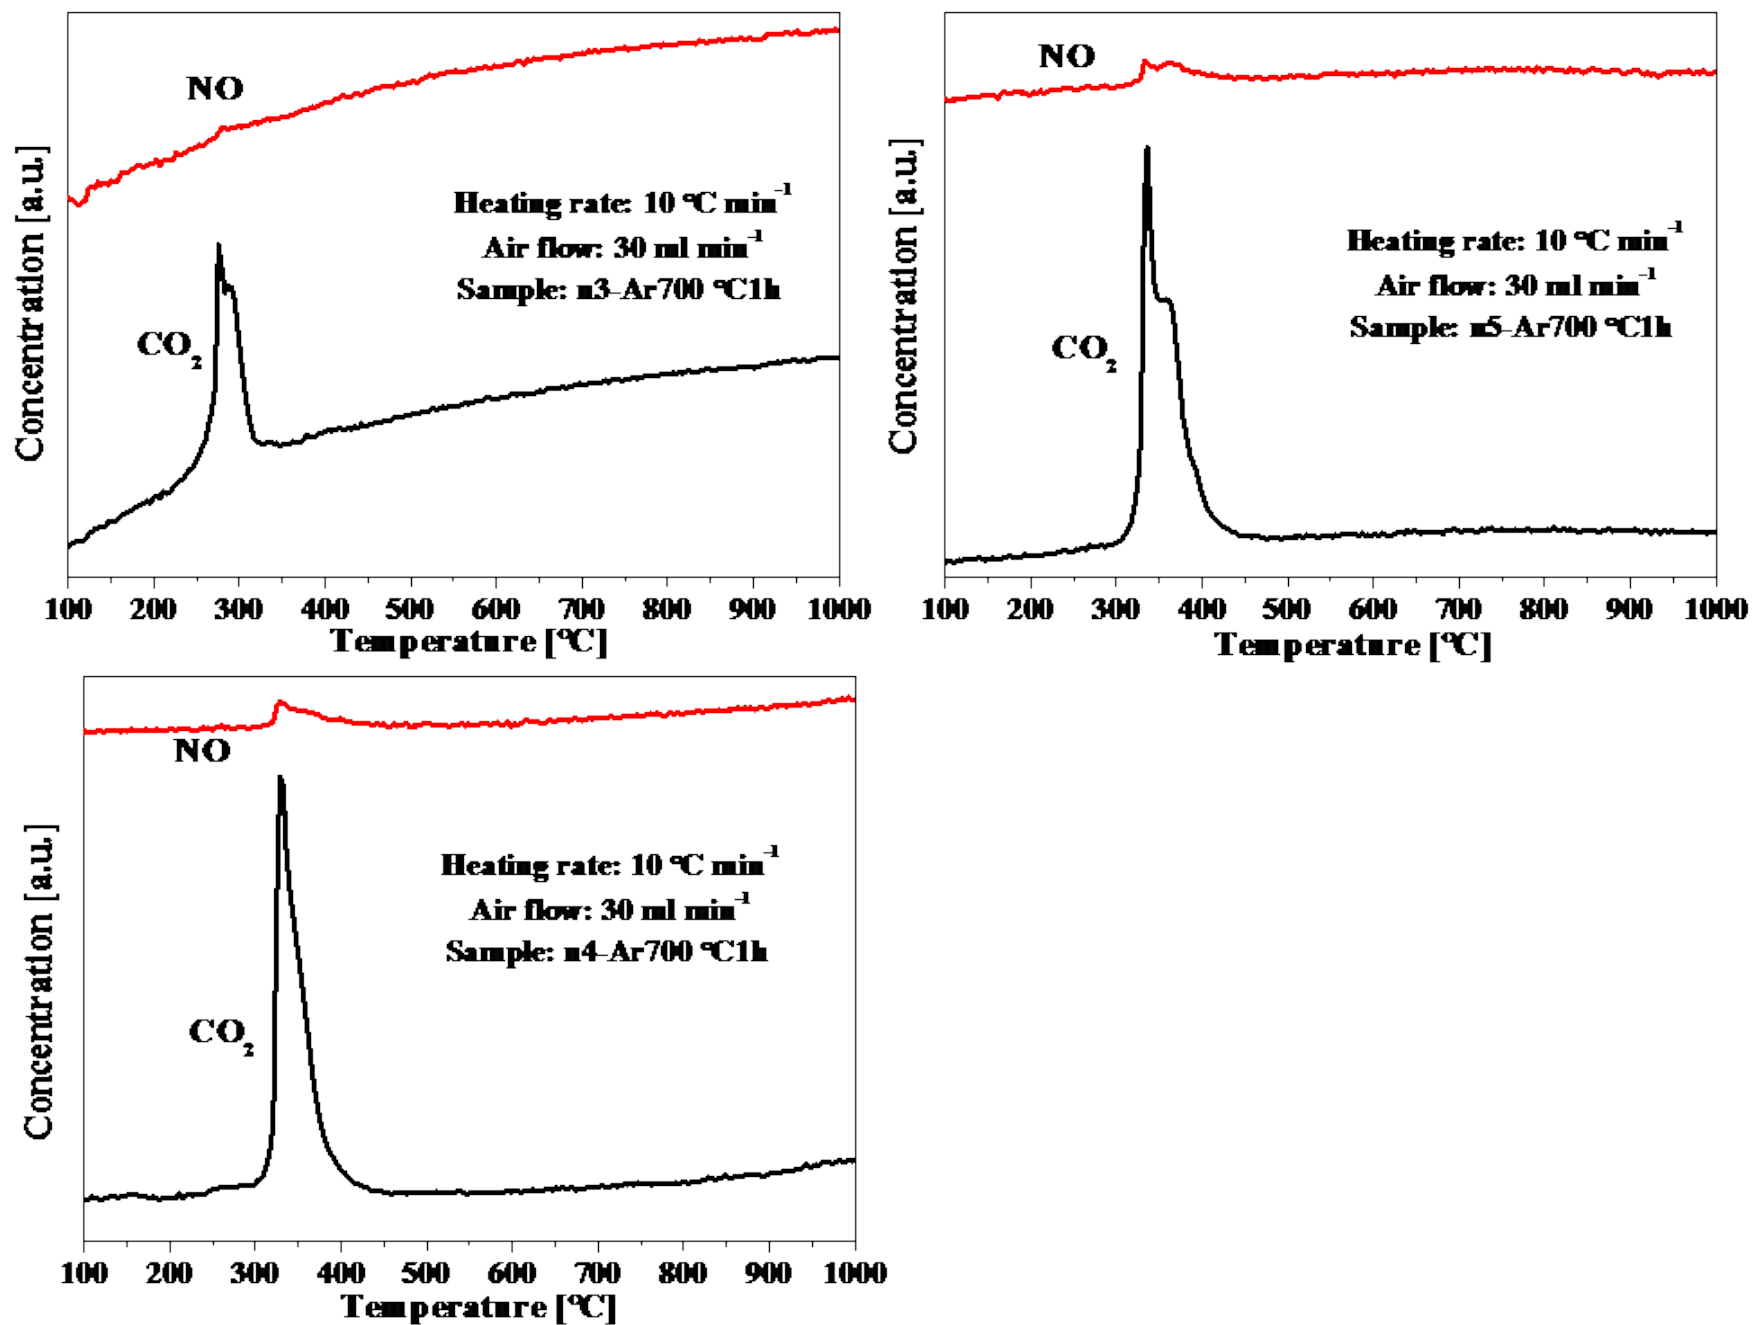

Figure S1. MS spectra of NO and CO<sub>2</sub> gases during TG air combustion.

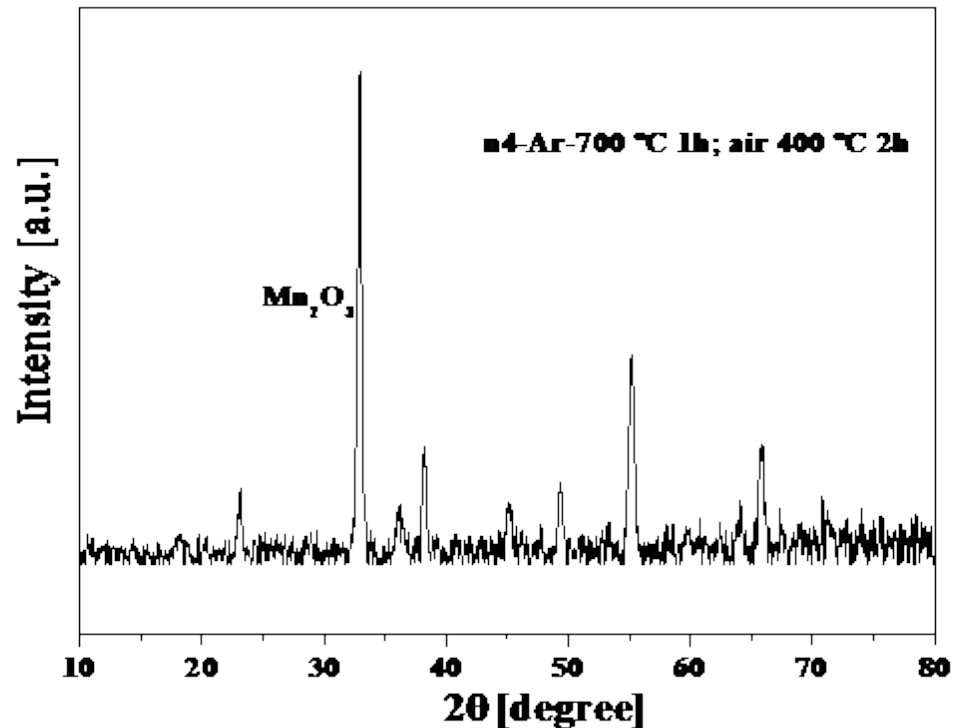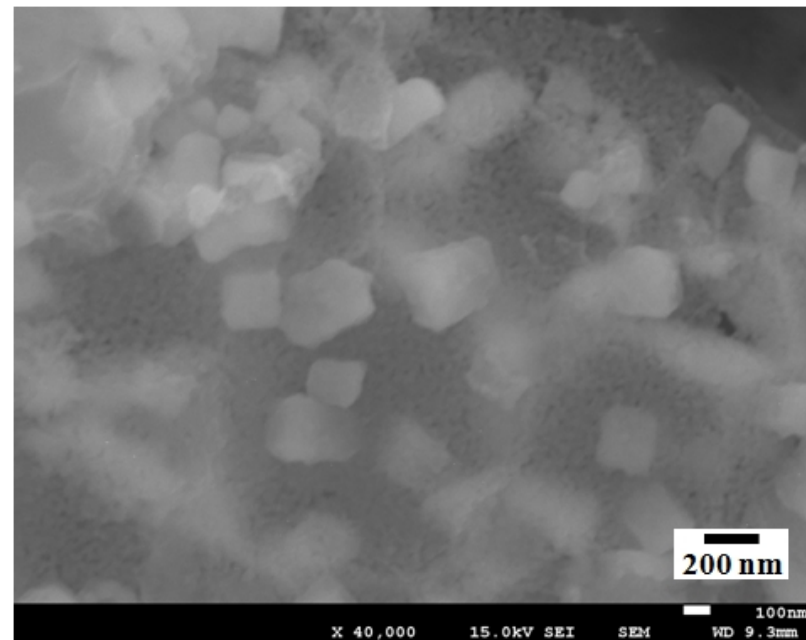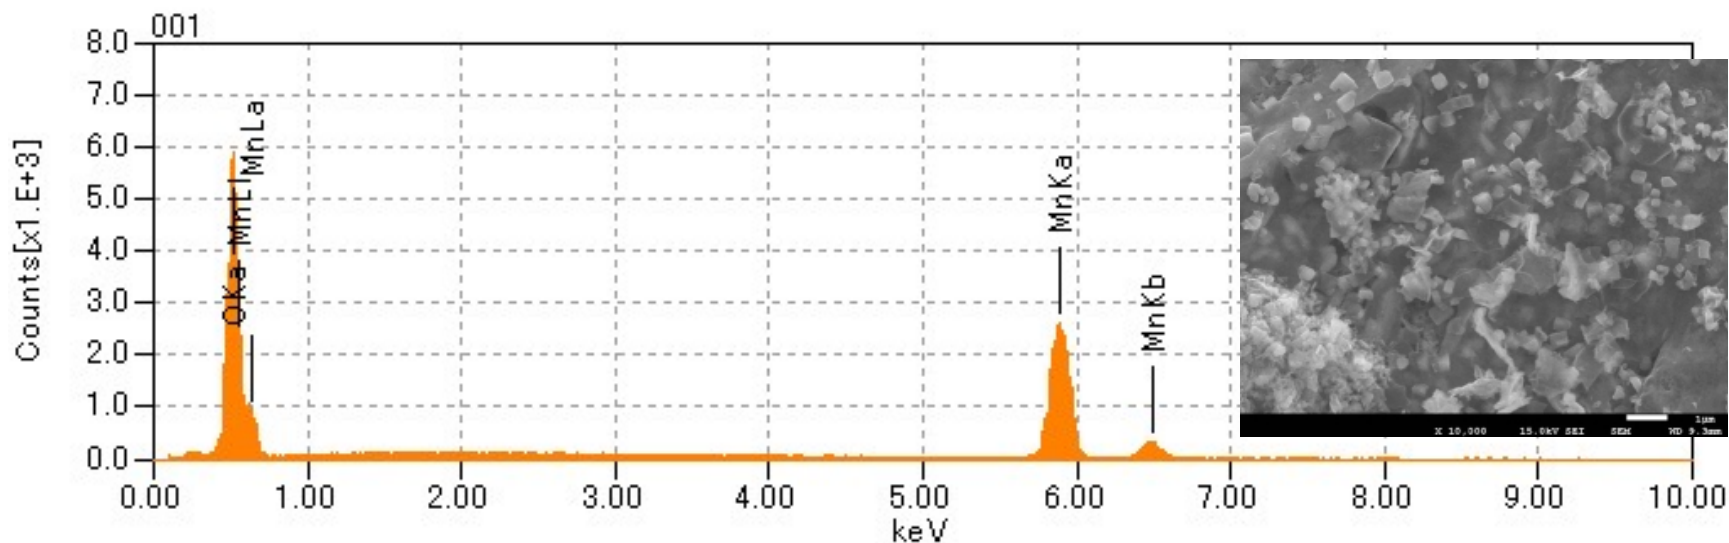

**Figure S2. XRD pattern, SEM image, and EDS spectra for sample n4, after calcination under air at 400 °C for 2 h.**
